# Supplementary material for: Identification of V6.51L as a selectivity hotspot in stereoselective A2B adenosine receptor antagonist recognition
Source: Sci Rep. 2021 Jul 8;11:14171. doi: 10.1038/s41598-021-93419-x (PMC8266863; doi:10.1038/s41598-021-93419-x)
Supplement: Supplementary file 1 — Supplementary Information. [file 41598_2021_93419_MOESM1_ESM.pdf]

## **SUPPORTING INFORMATION**

### **Identification of V6.51L as a selectivity hotspot in stereoselective A<sub>2</sub> receptor antagonist recognition**

Xuesong Wang<sup>1\*</sup>, Willem Jespers<sup>1,2\*</sup>, Ruben Prieto-Díaz<sup>3,4\*</sup>, Maria Majellaro<sup>3,4</sup>, Adriaan P.

IJzerman<sup>1</sup>, Gerard J. P. van Westen<sup>1</sup>, Eddy Sotelo<sup>3,4#</sup>, Laura H. Heitman<sup>2,5#</sup> and Hugo Gutiérrez-

de-Terán<sup>2#</sup>

#### **Table of Contents**

|                                                        |   |
|--------------------------------------------------------|---|
| <b>Supplementary Figure S1</b> .....                   | 2 |
| <b>Supplementary Figure S2</b> .....                   | 2 |
| <b>Supplementary Table S1</b> .....                    | 3 |
| <b>Supplementary Table S2</b> .....                    | 4 |
| <b>Spectroscopic and analytical data</b> .....         | 4 |
| <b>Enzyme-linked Immunosorbent assay (ELISA).</b> .... | 5 |
| <b>References</b> .....                                | 6 |

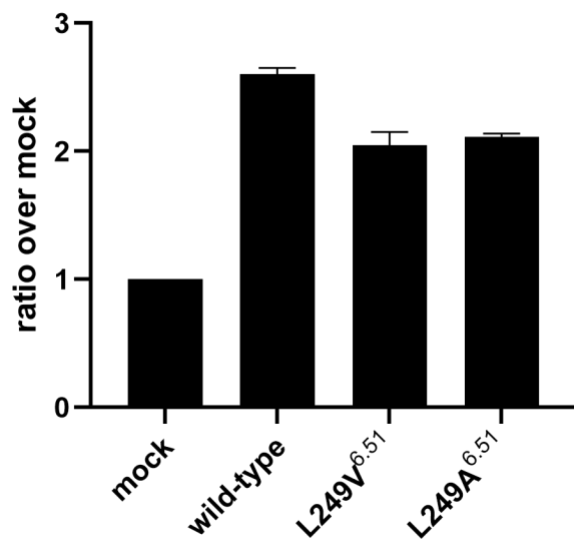

**Supplementary Figure S1.** Expression level of the transiently transfected WT A<sub>2A</sub>AR, and L249V<sup>6.51</sup> and L249A<sup>6.51</sup> mutant A<sub>2A</sub>AR at the surface of HEK293 cells. Data are shown as the mean  $\pm$  SEM of three individual experiments performed in sextuplicate.

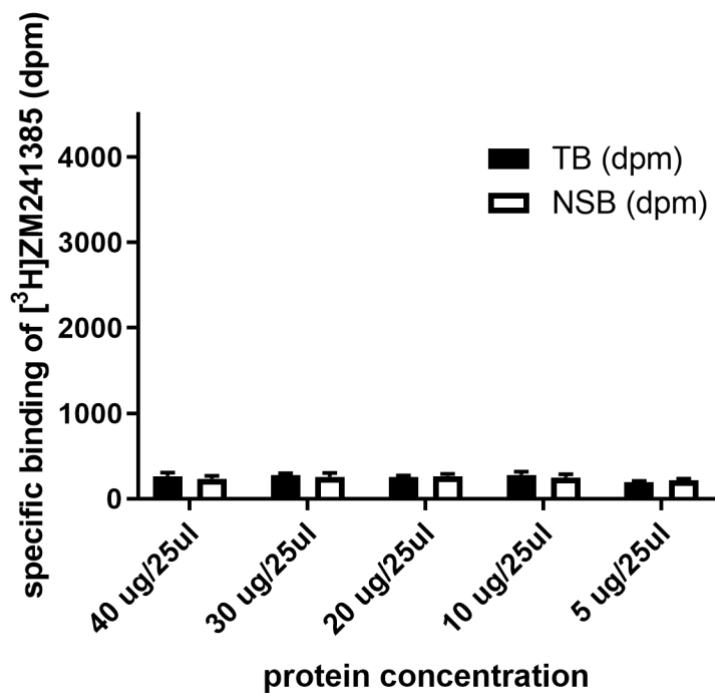

**Supplementary Figure S2.** Window check of HEK293 cell membrane transiently transfected by the L249<sup>6.51</sup>A mutant A<sub>2A</sub>AR in the presence of 1.7 nM [<sup>3</sup>H]ZM241385 in the absence (total binding; TB) and presence (non-specific binding; NSB) of NECA (100  $\mu$ M). Data is shown as the mean  $\pm$  SEM of three individual experiments performed in duplicate.

**Supplementary Table S1.** X-ray diffractometry experimental details of crystallographic (*R*)-ISAM-140 and (*S*)-ISAM-140.

| Crystal data                                                              |                        | ( <i>R</i> )-ISAM140                                          | ( <i>S</i> )-ISAM140                                          |
|---------------------------------------------------------------------------|------------------------|---------------------------------------------------------------|---------------------------------------------------------------|
| CCDC                                                                      |                        | 1966312                                                       | 1966450                                                       |
| Chemical                                                                  | formula                | C <sub>19</sub> H <sub>19</sub> N <sub>3</sub> O <sub>3</sub> | C <sub>19</sub> H <sub>19</sub> N <sub>3</sub> O <sub>3</sub> |
| M <sub>r</sub>                                                            |                        | 337.37                                                        | 337.37                                                        |
| Crystal system                                                            |                        | Monoclinic                                                    | Monoclinic                                                    |
| Space group                                                               |                        | C2                                                            | C2                                                            |
| Temperature (K)                                                           |                        | 100                                                           | 100                                                           |
| <i>a</i>                                                                  | (Å)                    | 16,4552 (9)                                                   | 16.4553 (4)                                                   |
| <i>B</i>                                                                  | (Å)                    | 8.0613 (4)                                                    | 8.0605 (2)                                                    |
| <i>c</i>                                                                  | (Å)                    | 13.5259 (7)                                                   | 13.5260 (3)                                                   |
| $\alpha$                                                                  | (°)                    | 90                                                            | 90                                                            |
| $\beta$                                                                   | (°)                    | 112.684 (3)                                                   | 112.678 (1)                                                   |
| $\gamma$                                                                  | (°)                    | 90                                                            | 90                                                            |
| <i>V</i>                                                                  | (Å <sup>3</sup> )      | 1655.42 (16)                                                  | 1655.35 (7)                                                   |
| <i>Z</i>                                                                  |                        | 4                                                             | 4                                                             |
| Radiation                                                                 | type                   | Cu-K $\alpha$                                                 | Cu-K $\alpha$                                                 |
| $\mu$ (mm <sup>-1</sup> )                                                 |                        | 0.76                                                          | 0.76                                                          |
| Crystal size                                                              | (mm)                   | 0.12 × 0.11 × 0.10                                            | 0.11 × 0.01 × 0.03                                            |
| Tmin, Tmax                                                                |                        | 0.852, 0.929                                                  | -                                                             |
| (sin $\theta/\lambda$ )                                                   | max (Å <sup>-1</sup> ) | 0.633                                                         | 0.625                                                         |
| Measured/Independent/<br>observed [ <i>I</i> > 2σ( <i>I</i> )] reflection |                        | 20568/3488/3266                                               | 17353/3370/3346                                               |
| R <sub>int</sub>                                                          |                        | 0.068                                                         | 0.076                                                         |
| $R[F^2 > 2\sigma(F^2)], wR(F^2), S$                                       |                        | 0.043, 0.102, 1.10                                            | 0.025, 0.069, 1.01                                            |
| $\Delta\rho_{\text{max}}/\Delta\rho_{\text{min}}$ (eÅ <sup>-3</sup> )     |                        | 0.19, -0.25                                                   | 0.16, -0.20                                                   |
| Absolute structure (Flack)                                                |                        | -0.1(2)                                                       | -0.02 (4)                                                     |

**Supplementary Table S2.** Experimental and FEP calculated energies for the L6.51V mutation, with the value for each FEP leg in the thermodynamic cycle included. The  $\Delta\Delta G$  values are plotted on Fig 5 on the main text. All  $(\Delta)\Delta G$  values are expressed in Kcal·mol<sup>-1</sup>. Standard error of the mean (sem) calculated from 10 replica simulations (FEP) or from the experimental data (see main text).  $\Delta\Delta G_{\text{exp}} = -RT\ln(K_i^{\text{wt}}/K_i^{\text{mut}})$

|             | $\Delta\Delta G_{\text{exp}}$ | $\Delta G_{\text{calc}} = \Delta G_{\text{apo}} - \Delta G_{\text{holo}}$ |                          |                         |
|-------------|-------------------------------|---------------------------------------------------------------------------|--------------------------|-------------------------|
|             |                               | $\Delta\Delta G_{\text{calc}}$                                            | $\Delta G_{\text{holo}}$ | $\Delta G_{\text{apo}}$ |
| ISAM-140(R) | -0.70±0.06                    | -0.39±0.36                                                                | -4.52±0.24               | -4.91±0.27              |
| ISAM-140(S) | -0.56±0.05                    | -0.50±0.35                                                                | -4.41±0.22               | -4.91±0.28              |
| ZM241385    | 0.57±0.11                     | 0.20±0.42                                                                 | -5.11±0.31               | -4.91±0.29              |

## Spectroscopic and analytical data for racemates and enantiomers isolated through chiral HPLC.

(±) Isopropyl 4-(furan-2-yl)-2-methyl-1,4-dihydrobenzo[4,5]imidazo[1,2-*a*]pyrimidine-3-carboxylate [(±) ISAM-140].<sup>1</sup> <sup>1</sup>H NMR (300 MHz, DMSO-*d*<sub>6</sub>),  $\delta$  (ppm): 10.78 (brs, 1H), 7.67–7.23 (m, 3H), 7.19–6.84 (m, 2H), 6.52 (s, 1H), 6.44 (d, *J* = 3.3 Hz, 1H), 6.37–6.23 (m, 1H), 4.86 (h, *J* = 6.3 Hz, 1H), 2.44 (s, 3H), 1.21 (d, *J* = 6.2 Hz, 3H), 1.05 (d, *J* = 6.1 Hz, 3H). <sup>13</sup>C NMR (75 MHz, DMSO-*d*<sub>6</sub>),  $\delta$  (ppm): 165.0, 153.3, 148.0, 146.0, 143.0, 142.6, 132.0, 122.3, 120.7, 117.2, 110.8, 110.2, 108.2, 94.9, 67.0, 49.7, 22.3, 22.0, 19.1. HRMS (ESI) *m/z*: calcd for C<sub>19</sub>H<sub>20</sub>N<sub>3</sub>O<sub>3</sub> [M + H]<sup>+</sup>: 338.1488; found: 338.7927.

Isopropyl (R)-4-(furan-2-yl)-2-methyl-1,4-dihydrobenzo[4,5]imidazo[1,2-*a*]pyrimidine-3-carboxylate [(R)-ISAM-140]. <sup>1</sup>H NMR (300 MHz, DMSO-*d*<sub>6</sub>), δ (ppm): 10.76 (s, 1H), 7.41 (d, *J* = 11.0 Hz, 2H), 7.34 (d, *J* = 7.7 Hz, 1H), 7.04 (dt, *J* = 18.2, 7.0 Hz, 2H), 6.52 (s, 1H), 6.44 (d, *J* = 3.3 Hz, 1H), 6.35 – 6.27 (m, 1H), 4.87 (p, *J* = 6.3 Hz, 1H), 2.44 (s, 3H), 1.21 (d, *J* = 6.3 Hz, 3H), 1.05 (d, *J* = 6.4 Hz, 3H). <sup>13</sup>C NMR (75 MHz, DMSO-*d*<sub>6</sub>), δ (ppm): 165.0, 153.3, 148.0, 146.0, 143.1, 142.6, 132.0, 122.3, 121.0, 117.2, 110.8, 110.2, 108.7, 95.0, 67.0, 49.7, 22.3, 22.1, 19.1. HRMS (APCI) *m/z* calcd for C<sub>19</sub>H<sub>19</sub>N<sub>3</sub>O<sub>3</sub> [M+H]<sup>+</sup>: 338.1499; found: 338.1501.

Isopropyl (R)-4-(furan-2-yl)-2-methyl-1,4-dihydrobenzo[4,5]imidazo[1,2-*a*]pyrimidine-3-carboxylate [(S)-ISAM-140]. <sup>1</sup>H NMR (300 MHz, DMSO-*d*<sub>6</sub>), δ (ppm): 10.78 (s, 1H), 7.42 (d, *J* = 10.9 Hz, 2H), 7.35 (d, *J* = 7.8 Hz, 1H), 7.04 (dt, *J* = 18.2, 7.0 Hz, 2H), 6.54 (s, 1H), 6.44 (d, *J* = 3.3 Hz, 1H), 6.40 – 6.29 (m, 1H), 4.87 (p, *J* = 6.3 Hz, 1H), 2.44 (s, 3H), 1.21 (d, *J* = 6.3 Hz, 3H), 1.05 (d, *J* = 6.4 Hz, 3H). <sup>13</sup>C NMR (75 MHz, DMSO-*d*<sub>6</sub>), δ (ppm): 165.0, 153.3, 148.0, 146.0, 143.0, 142.6, 132.0, 122.3, 120.7, 117.5, 110.8, 110.3, 108.4, 94.9, 67.0, 49.7, 22.3, 22.2, 19.0. HRMS (APCI) *m/z* calcd for C<sub>19</sub>H<sub>19</sub>N<sub>3</sub>O<sub>3</sub> [M+H]<sup>+</sup>: 338.1499; found: 338.1501.

**Enzyme-linked Immunosorbent assay (ELISA).** The experiment was performed as described previously.<sup>2</sup> Briefly, 24 hours after transfection, cells were split into a 96-well poly-D- lysine-coated plates at a density of 10<sup>6</sup> cells per well. After an additional 24 h, the cells were fixed with 4% formaldehyde and blocked with 2% bovine serum albumin (BSA) (Sigma-Aldrich Chemie N.V., Zwijndrecht, The Netherlands) in Tris-buffered saline (TBS). Then, the cells

were incubated with monoclonal M1-anti-FLAG antibody (1:2250) (Sigma-Aldrich Chemie N.V. Zwijndrecht, The Netherlands) in Tris-buffered saline (TBS)/1 mM CaCl<sub>2</sub> for 2 hours at room temperature (RT). Next, the antibody was removed and the cells were washed with TBS/1 mM CaCl<sub>2</sub> before adding the secondary antibody, monoclonal anti-Mouse-HRP (1:5000) (Jackson ImmunoResearch Europe Ltd., Cambridgeshire, UK) and incubating for 1 hour at RT. After removing the secondary antibody and washing the cells with TBS/1 mM CaCl<sub>2</sub>, 3, 3',5,5'-tetramethyl-benzidine (TMB) was added and incubated for 5 minutes in the dark. The reaction was stopped with 1 M H<sub>3</sub>PO<sub>4</sub>, and absorbance was read at 450 nm using a Wallac EnVision 2104 Multilabel reader (PerkinElmer).

## References

1. El Maatougui, A. *et al.* Discovery of potent and highly selective A2B adenosine receptor antagonist chemotypes. *J. Med. Chem.* **59**, 1967–1983 (2016).
2. Lane, J. R. *et al.* A novel nonribose agonist, LUF5834, engages residues that are distinct from those of adenosine-like ligands to activate the adenosine A2a receptor. *Mol. Pharmacol.* **81**, 475–487 (2012).
